# Supplementary material for: Negatively charged singly-bonded dimers of C1-[C70(CF3)10] and bare C70 fullerene
Source: Royal Society of Chemistry journal article supplement (doi:10.1039/c8nj05847d), 2019-01-01
Supplement: c8nj05847d1.pdf [file c8nj05847d1.pdf]

**Negatively charged singly-bonded dimers of substituted  $C_{1-}[C_{70}(CF_3)_{10}]$  and  
unsubstituted  $[C_{70}]$  fullerenes.**

Dmitri V. Konarev,<sup>\*a</sup> Salavat S. Khasanov,<sup>b</sup> Alexey A. Goryunkov,<sup>c</sup> Sergey I.  
Trojanov,<sup>c</sup> Victor A. Brotsman,<sup>c</sup> Ilya N. Ioffe,<sup>c</sup> and Rimma N. Lyubovskaya<sup>a</sup>

<sup>a</sup>Institute of Problems of Chemical Physics RAS, Chernogolovka, Moscow region, 142432  
Russia;

<sup>b</sup>Institute of Solid State Physics RAS, Chernogolovka, Moscow region, 142432 Russia;

<sup>c</sup>Lomonosov Moscow State University, Leninskie Gory, Moscow, 119991 Russia.

## Supporting information.

**Table S1.** IR spectra of the starting compounds and salts **1** and **2**.

| Components                                    | C <sub>1</sub> -<br>C <sub>70</sub> (CF <sub>3</sub> ) <sub>10</sub> | C <sub>70</sub> | cryptand[2.2.2] | { cryptand[2.2.2](K <sup>+</sup> ) } <sub>2</sub><br>{ C <sub>70</sub> (CF <sub>3</sub> ) <sub>10</sub> <sup>-</sup> } <sub>2</sub><br>·0.71C <sub>6</sub> H <sub>14</sub> ·0.20C <sub>6</sub> H <sub>4</sub> Cl <sub>2</sub> ( <b>1</b> ) | { cryptand[2.2.2](K <sup>+</sup> ) } <sub>2</sub><br>(C <sub>70</sub> <sup>-</sup> ) <sub>2</sub><br>·2.25C <sub>6</sub> H <sub>4</sub> Cl <sub>2</sub> ·0.75C <sub>6</sub> H <sub>14</sub> ( <b>2</b> ) |
|-----------------------------------------------|----------------------------------------------------------------------|-----------------|-----------------|--------------------------------------------------------------------------------------------------------------------------------------------------------------------------------------------------------------------------------------------|----------------------------------------------------------------------------------------------------------------------------------------------------------------------------------------------------------|
| Fullerene                                     | -                                                                    | 457w            |                 | 510w                                                                                                                                                                                                                                       | 451w                                                                                                                                                                                                     |
|                                               | -                                                                    | 534s            |                 | 524w*                                                                                                                                                                                                                                      | 471w*                                                                                                                                                                                                    |
|                                               | 601w                                                                 | 564m            |                 | 604w                                                                                                                                                                                                                                       | 506w                                                                                                                                                                                                     |
|                                               | 654w                                                                 | 576s            |                 | 658w                                                                                                                                                                                                                                       | 530m*                                                                                                                                                                                                    |
|                                               | 669w                                                                 | 642m            |                 | 665w                                                                                                                                                                                                                                       | 548w                                                                                                                                                                                                     |
|                                               | 708m                                                                 | 673m            |                 | 706w                                                                                                                                                                                                                                       | 555w                                                                                                                                                                                                     |
|                                               | 713w sp                                                              | 794m            |                 |                                                                                                                                                                                                                                            | 574w                                                                                                                                                                                                     |
|                                               | 716w sp                                                              | 1132w           |                 | 712m                                                                                                                                                                                                                                       | 659w                                                                                                                                                                                                     |
|                                               | 727m                                                                 | 1413w           |                 | 728w                                                                                                                                                                                                                                       | 669w*                                                                                                                                                                                                    |
|                                               | 732m                                                                 | 1429s           |                 |                                                                                                                                                                                                                                            | 695w                                                                                                                                                                                                     |
|                                               | 737s                                                                 |                 |                 | 736w*                                                                                                                                                                                                                                      | 711w                                                                                                                                                                                                     |
|                                               | 744m                                                                 |                 |                 | -                                                                                                                                                                                                                                          | 720w                                                                                                                                                                                                     |
|                                               | 748m                                                                 |                 |                 | 748m                                                                                                                                                                                                                                       | 789w                                                                                                                                                                                                     |
|                                               | 754m                                                                 |                 |                 | -                                                                                                                                                                                                                                          | 800m                                                                                                                                                                                                     |
|                                               | 790w                                                                 |                 |                 | 800w                                                                                                                                                                                                                                       | 842w                                                                                                                                                                                                     |
|                                               | -                                                                    |                 |                 | 813w                                                                                                                                                                                                                                       | 888w                                                                                                                                                                                                     |
|                                               | 816m                                                                 |                 |                 | 847w                                                                                                                                                                                                                                       | 1101vs*                                                                                                                                                                                                  |
|                                               | 866w                                                                 |                 |                 | 879w                                                                                                                                                                                                                                       | 1155w                                                                                                                                                                                                    |
|                                               | -                                                                    |                 |                 | 900w                                                                                                                                                                                                                                       | 1176w                                                                                                                                                                                                    |
|                                               | 902w                                                                 |                 |                 | -                                                                                                                                                                                                                                          | 1209w*                                                                                                                                                                                                   |
|                                               | 925w                                                                 |                 |                 | 934w                                                                                                                                                                                                                                       | 1257w                                                                                                                                                                                                    |
|                                               | 938w                                                                 |                 |                 | 940w                                                                                                                                                                                                                                       | 1278w                                                                                                                                                                                                    |
|                                               | 945m                                                                 |                 |                 | -                                                                                                                                                                                                                                          | 1278w                                                                                                                                                                                                    |
|                                               | 963m                                                                 |                 |                 | -                                                                                                                                                                                                                                          | 1392m                                                                                                                                                                                                    |
|                                               | 977w                                                                 |                 |                 | -                                                                                                                                                                                                                                          | 1428s                                                                                                                                                                                                    |
|                                               | 988w                                                                 |                 |                 | -                                                                                                                                                                                                                                          | 1455s*                                                                                                                                                                                                   |
|                                               | 1012w                                                                |                 |                 | 1008w                                                                                                                                                                                                                                      | 1479w*                                                                                                                                                                                                   |
|                                               | 1035w                                                                |                 |                 | -                                                                                                                                                                                                                                          | 1550w                                                                                                                                                                                                    |
|                                               | 1048m                                                                |                 |                 | 1056w                                                                                                                                                                                                                                      |                                                                                                                                                                                                          |
|                                               | 1093w sp                                                             |                 |                 | -                                                                                                                                                                                                                                          |                                                                                                                                                                                                          |
|                                               | 1100w sp                                                             |                 |                 | -                                                                                                                                                                                                                                          |                                                                                                                                                                                                          |
|                                               | 1176vs                                                               |                 |                 | -                                                                                                                                                                                                                                          |                                                                                                                                                                                                          |
|                                               | 1197s                                                                |                 |                 | 1165s sh                                                                                                                                                                                                                                   |                                                                                                                                                                                                          |
|                                               | 1239s                                                                |                 |                 | 1191s                                                                                                                                                                                                                                      |                                                                                                                                                                                                          |
| 1458w                                         |                                                                      |                 | 1251vs          |                                                                                                                                                                                                                                            |                                                                                                                                                                                                          |
|                                               |                                                                      |                 | 1459w*          |                                                                                                                                                                                                                                            |                                                                                                                                                                                                          |
|                                               |                                                                      |                 | -               |                                                                                                                                                                                                                                            |                                                                                                                                                                                                          |
| Cryptand[K <sup>+</sup> ]                     |                                                                      |                 | 476w            | 524w                                                                                                                                                                                                                                       | 471w*                                                                                                                                                                                                    |
|                                               |                                                                      |                 | 528w            | -                                                                                                                                                                                                                                          | 528m*                                                                                                                                                                                                    |
|                                               |                                                                      |                 | 581w            | 735m*                                                                                                                                                                                                                                      | 574w*                                                                                                                                                                                                    |
|                                               |                                                                      |                 | 735m            | 921w                                                                                                                                                                                                                                       | 750s*                                                                                                                                                                                                    |
|                                               |                                                                      |                 | 922m            | 952m                                                                                                                                                                                                                                       | 938s                                                                                                                                                                                                     |
|                                               |                                                                      |                 | 948w            | 979w                                                                                                                                                                                                                                       | -                                                                                                                                                                                                        |
|                                               |                                                                      |                 | 982m            | 1044m                                                                                                                                                                                                                                      | 983w                                                                                                                                                                                                     |
|                                               |                                                                      |                 | 1038w           | 1084m                                                                                                                                                                                                                                      | 1033m*                                                                                                                                                                                                   |
|                                               |                                                                      |                 | 1071m           | 1107vs                                                                                                                                                                                                                                     | 1056w                                                                                                                                                                                                    |
|                                               |                                                                      |                 | 1100s           | 1135m                                                                                                                                                                                                                                      | 1101vs*                                                                                                                                                                                                  |
|                                               |                                                                      |                 | 1127s           | -                                                                                                                                                                                                                                          | 1132m                                                                                                                                                                                                    |
|                                               |                                                                      |                 | 1213w           | 1297w                                                                                                                                                                                                                                      | 1209w*                                                                                                                                                                                                   |
|                                               |                                                                      |                 | 1295m           | -                                                                                                                                                                                                                                          | 1298w                                                                                                                                                                                                    |
|                                               |                                                                      |                 | 1329m           | 1355m                                                                                                                                                                                                                                      | 1323w                                                                                                                                                                                                    |
|                                               |                                                                      |                 | 1360s           | 1448w                                                                                                                                                                                                                                      | 1354s                                                                                                                                                                                                    |
|                                               |                                                                      |                 | 1446m           | 1459w*                                                                                                                                                                                                                                     | 1455s*                                                                                                                                                                                                   |
|                                               |                                                                      |                 | 1462m           | 1479w                                                                                                                                                                                                                                      | -                                                                                                                                                                                                        |
|                                               |                                                                      |                 | 1490w           | 2817w                                                                                                                                                                                                                                      | 1479w*                                                                                                                                                                                                   |
|                                               |                                                                      |                 | 2790w           | 2886w                                                                                                                                                                                                                                      |                                                                                                                                                                                                          |
|                                               |                                                                      |                 | 2877w           | 2968w                                                                                                                                                                                                                                      | 2879w                                                                                                                                                                                                    |
|                                               |                                                                      | 2943w           |                 | 2940w                                                                                                                                                                                                                                      |                                                                                                                                                                                                          |
| C <sub>6</sub> H <sub>4</sub> Cl <sub>2</sub> |                                                                      |                 |                 |                                                                                                                                                                                                                                            | 750s*                                                                                                                                                                                                    |
|                                               |                                                                      |                 |                 |                                                                                                                                                                                                                                            | 669w                                                                                                                                                                                                     |
|                                               |                                                                      |                 |                 |                                                                                                                                                                                                                                            | 1033m*                                                                                                                                                                                                   |
|                                               |                                                                      |                 |                 |                                                                                                                                                                                                                                            | 1455s*                                                                                                                                                                                                   |

w – weak, m – middle, s – strong, vs – very strong intensity; \* – the bands are coincided.

IR spectra of pristine compounds and salts 1 and 2.

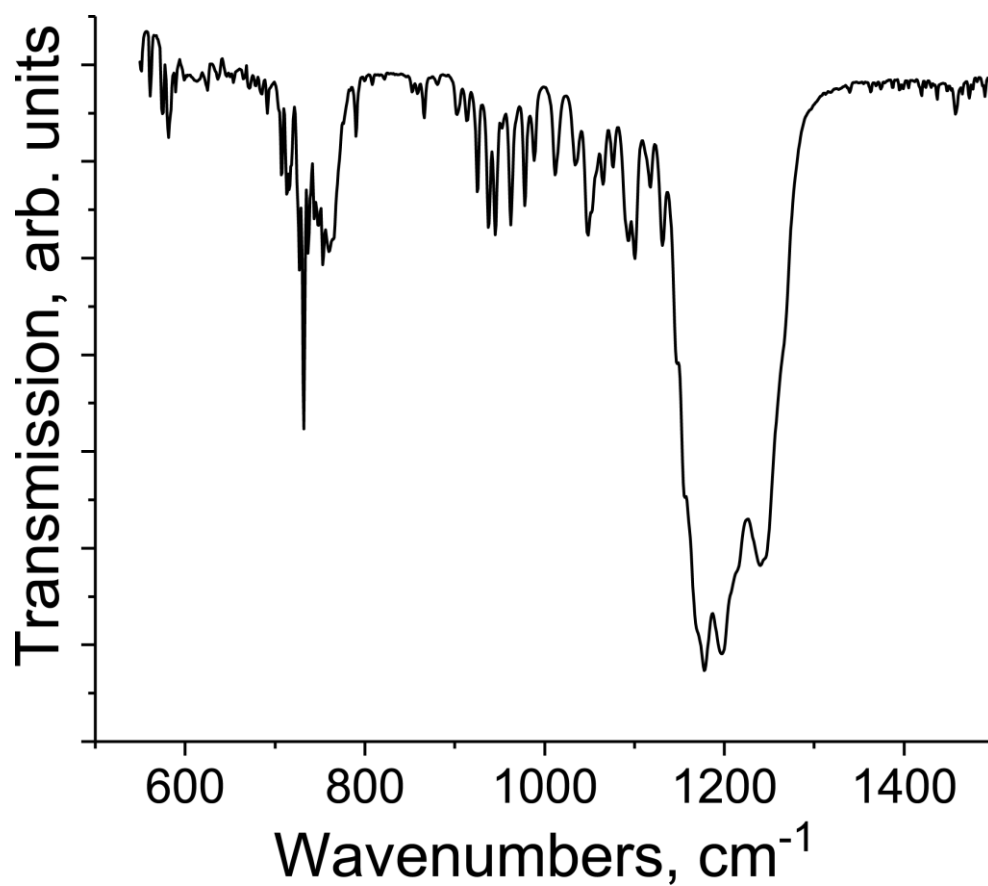

**Fig. S1.** IR spectrum of pristine  $C_1-C_{70}(CF_3)_{10}$  on the diamond/ZnSe window .

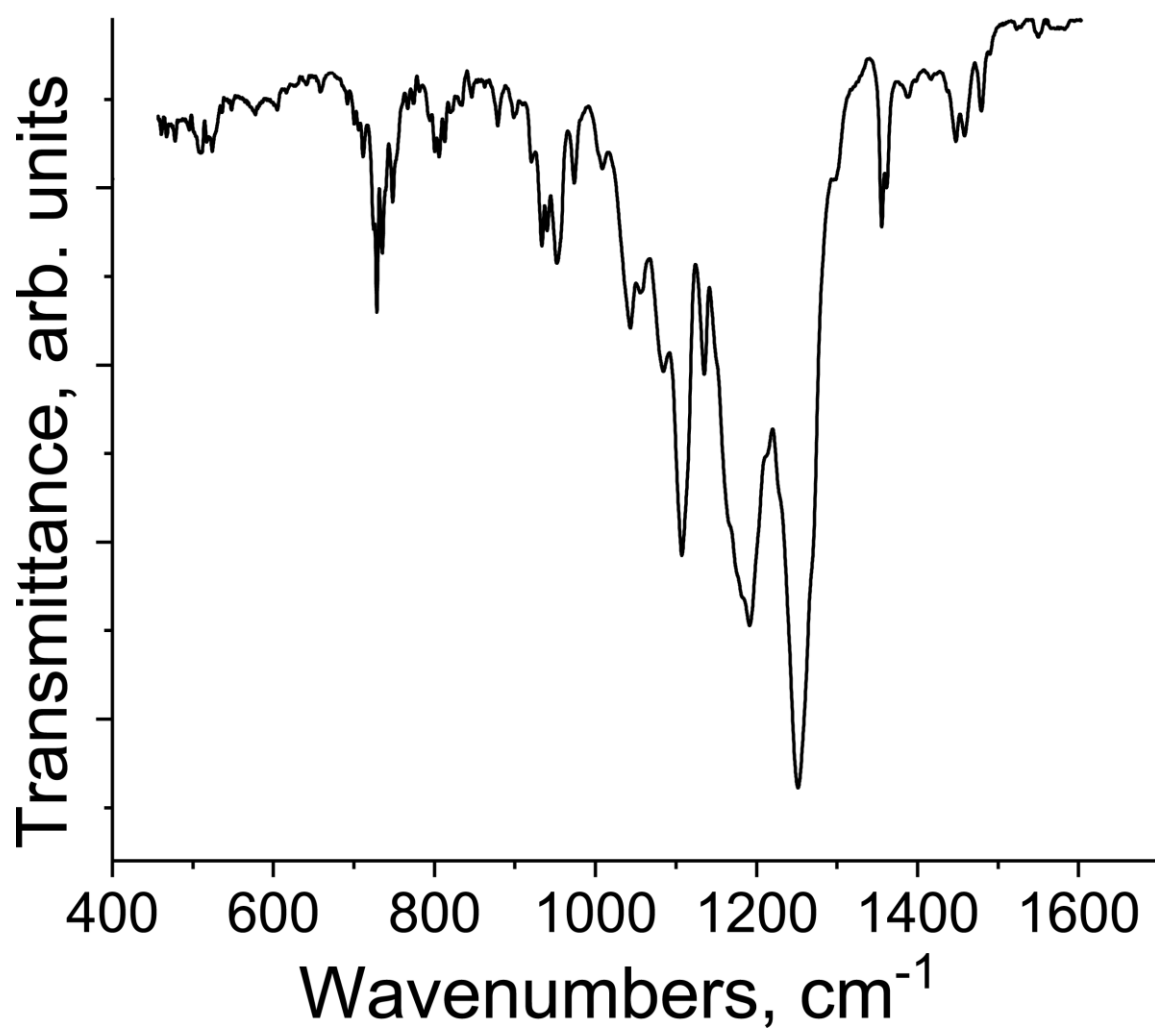

**Fig. S2.** IR spectrum of salt  $\{\text{cryptand}[2.2.2](\text{K}^+)\}_2\{\text{C}_{70}(\text{CF}_3)_{10}^-\}_2 \cdot 0.71\text{C}_6\text{H}_{14} \cdot 0.20\text{C}_6\text{H}_4\text{Cl}_2$  (**1**) in KBr pellet prepared in an anaerobic conditions.

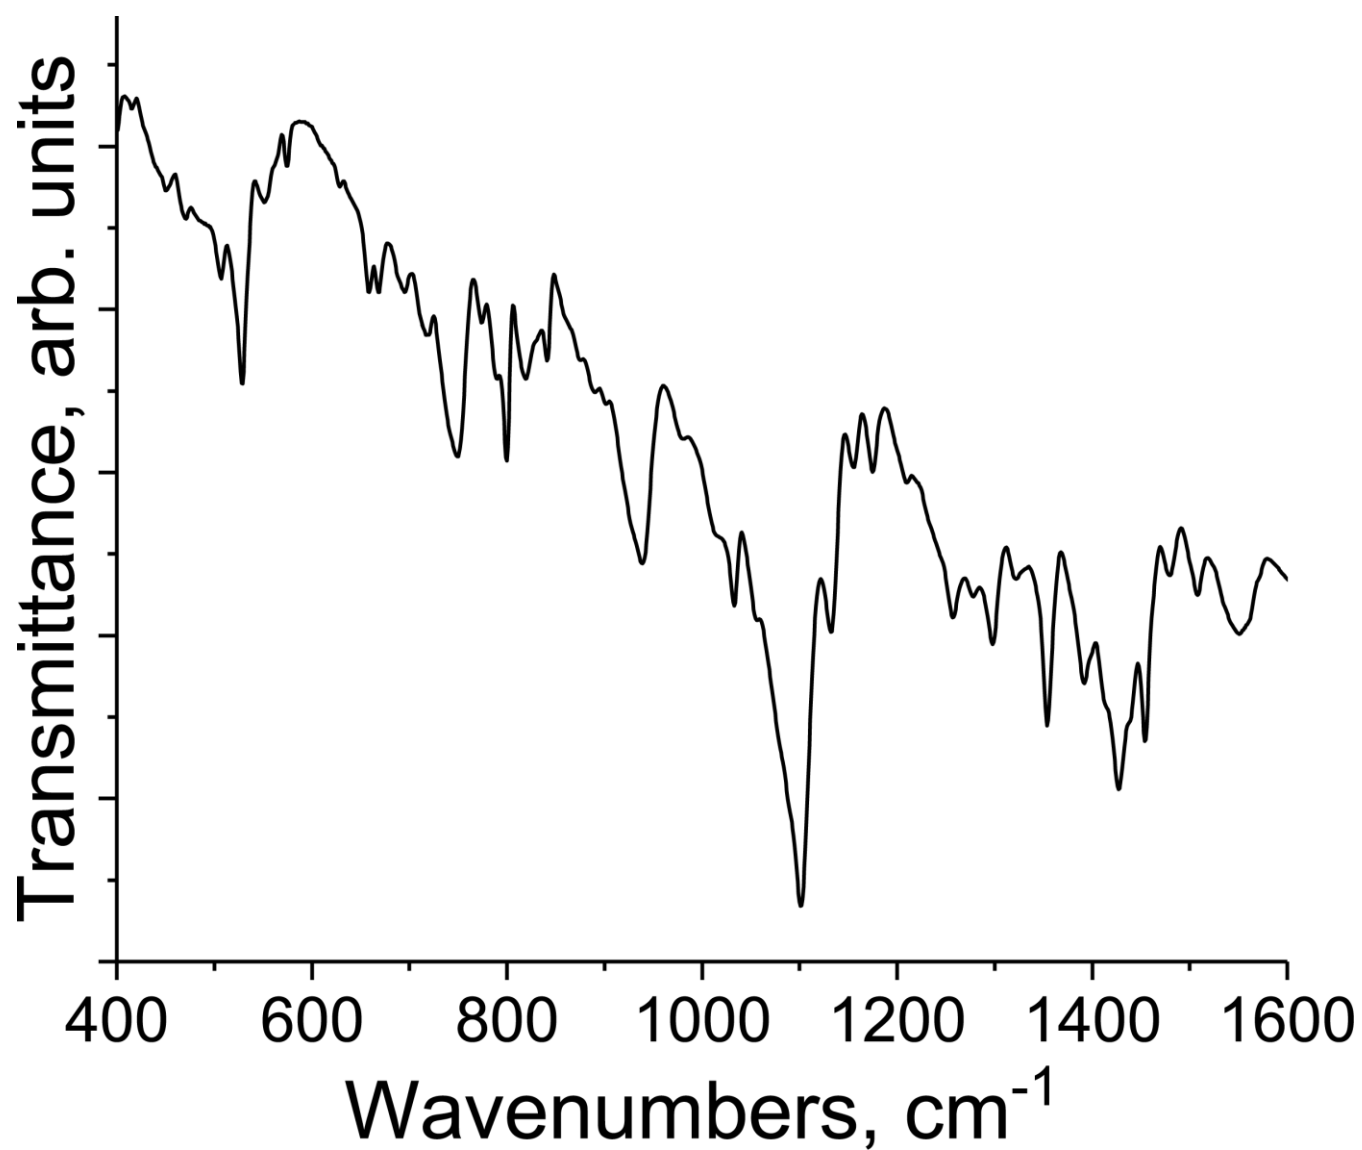

**Fig. S3.** IR spectrum of salt {cryptand[2.2.2](K<sup>+</sup>)<sub>2</sub>(C<sub>70</sub><sup>-</sup>)<sub>2</sub>·2.25C<sub>6</sub>H<sub>4</sub>Cl<sub>2</sub>·0.75C<sub>6</sub>H<sub>14</sub> (2) in KBr pellet prepared in an anaerobic conditions.
